# Supplementary material for: Analysis of Potential Biomarkers in Frontal Temporal Dementia: A Bioinformatics Approach
Source: MDPI journal article supplement (doi:10.3390/ijms241914910), 2023-10-05
Supplement: s1 [file s1]

**Supplementary Table S1.** Samples from the GEO dataset GSE193391 that are considered for our study.

| Control Samples |     |        |       |             |
|-----------------|-----|--------|-------|-------------|
| Accession       | Age | Sex    | Race  | APOE status |
| GSM5799484      | 52  | Female | White | E3/4        |
| GSM5799495      | 59  | Male   | Black | E2/3        |
| GSM5799498      | 57  | Male   | White | E3/3        |
| GSM5799485      | 78  | Female | White | E3/3        |
| GSM5799504      | 56  | Male   | White | NA          |
| GSM5799489      | 70  | Male   | Black | E3/3        |
| GSM5799493      | 75  | Female | White | E3/3        |
| GSM5799506      | 74  | Female | White | E3/3        |
| FTD Samples     |     |        |       |             |
| Accession       | Age | Sex    | Race  | APOE status |
| GSM5799499      | 81  | Male   | White | E3/3        |
| GSM5799500      | 60  | Female | White | E3/4        |
| GSM5799501      | 64  | Male   | White | E3/4        |
| GSM5799488      | 71  | Male   | White | NA          |
| GSM5799505      | 56  | Female | White | NA          |
| GSM5799490      | 65  | Female | White | E2/3        |
| GSM5799492      | 65  | Female | White | NA          |
| GSM5799494      | 63  | Male   | White | E3/3        |

**Supplementary Table S2.** List of genes that are differentially expressed between control and FTD samples from African American and white ethnic background

| ID            | log2(fold change) | Log10(Pvalue) |
|---------------|-------------------|---------------|
| RAB3A - mRNA  | 1.915144402       | 3.77847022    |
| NEFL - mRNA   | 1.897532002       | 2.733218677   |
| KCNV1 - mRNA  | 1.885089293       | 2.719638972   |
| BDNF - mRNA   | 1.866737397       | 3.591163588   |
| YWHAH - mRNA  | 1.6608987         | 2.405732385   |
| GABRG2 - mRNA | 1.628626591       | 2.853410941   |
| SH3GL2 - mRNA | 1.583076732       | 2.06976279    |
| SYN2 - mRNA   | 1.57975656        | 2.906948704   |
| RIMS1 - mRNA  | 1.568248876       | 4.093696854   |
| PAK1 - mRNA   | 1.536618015       | 3.345044705   |
| LRRC7 - mRNA  | 1.483228062       | 2.949637769   |
| OLFM3 - mRNA  | 1.478048842       | 2.196272335   |
| NSF - mRNA    | 1.470471918       | 2.8267357     |
| SYT4 - mRNA   | 1.463409341       | 2.047512958   |
| RTN1 - mRNA   | 1.424424538       | 2.802983479   |
| SNAP25 - mRNA | 1.421016388       | 1.947949038   |
| PTK2B - mRNA  | 1.410402443       | 3.341846011   |
| NAP1L2 - mRNA | 1.403716046       | 1.904585667   |
| EGR1 - mRNA   | 1.384945572       | 2.389110077   |
| CAMK2A - mRNA | 1.378496175       | 3.43386502    |
| NUAK1 - mRNA  | 1.369764371       | 3.644423765   |
| GNG2 - mRNA   | 1.357187146       | 3.320099298   |
| GOT1 - mRNA   | 1.325792453       | 2.378155293   |
| INPP5F - mRNA | 1.305575319       | 3.243018577   |
| WASF1 - mRNA  | 1.301920962       | 1.892321479   |
| PPP3R1 - mRNA | 1.30075068        | 2.529676746   |
| STXBP1 - mRNA | 1.300095155       | 3.621653783   |

|                |             |             |
|----------------|-------------|-------------|
| GABRA4 - mRNA  | 1.219070941 | 4.509554079 |
| DNM1 - mRNA    | 1.201255269 | 2.352457955 |
| GLRB - mRNA    | 1.200900947 | 2.215614688 |
| ATP6V1A - mRNA | 1.196505702 | 3.115400512 |
| ATP1B1 - mRNA  | 1.193819927 | 2.031703794 |
| GLRA3 - mRNA   | 1.183966166 | 3.092616856 |
| KCNQ3 - mRNA   | 1.179882463 | 3.412678642 |
| CHN1 - mRNA    | 1.174702891 | 2.544797267 |
| CAMK4 - mRNA   | 1.173708395 | 3.232712429 |
| RTN4 - mRNA    | 1.15831902  | 4.394279735 |
| ATP8A2 - mRNA  | 1.14966702  | 2.950537222 |
| SCN8A - mRNA   | 1.146906285 | 2.008116859 |
| GABRB3 - mRNA  | 1.145156702 | 2.87116907  |
| SLC9A6 - mRNA  | 1.131125193 | 2.361239462 |
| RAB6B - mRNA   | 1.126458729 | 3.474648238 |
| ADAM22 - mRNA  | 1.116226691 | 2.356014975 |
| OPCML - mRNA   | 1.107954773 | 2.135919814 |
| MAPK9 - mRNA   | 1.103027034 | 4.643847565 |
| GAS7 - mRNA    | 1.076166641 | 4.123247843 |
| GABRD - mRNA   | 1.076020515 | 3.117773673 |
| GNG3 - mRNA    | 1.0698848   | 1.987961021 |
| ELOC - mRNA    | 1.064341266 | 4.247940241 |
| DLGAP1 - mRNA  | 1.058353261 | 2.472027972 |
| SCOC - mRNA    | 1.055877723 | 2.578757727 |
| CHRM3 - mRNA   | 1.042085502 | 2.447089994 |
| GRIA3 - mRNA   | 1.035749257 | 3.037924991 |
| GPRASP1 - mRNA | 1.033593913 | 2.287202604 |
| EPB41L3 - mRNA | 1.031961645 | 2.467957958 |
| VDAC3 - mRNA   | 1.030329792 | 3.060049353 |
| CD200 - mRNA   | 1.025489227 | 2.450437883 |

|                  |             |             |
|------------------|-------------|-------------|
| TSPAN7 - mRNA    | 1.00912407  | 2.571620596 |
| ATP6V1B2 - mRNA  | 1.007374069 | 2.305591583 |
| GRM7 - mRNA      | 1.003906517 | 3.22158249  |
| NPTN - mRNA      | 0.986291875 | 2.878055769 |
| SYN1 - mRNA      | 0.96976014  | 2.070087775 |
| ELMO1 - mRNA     | 0.966630928 | 2.077737383 |
| VDAC1 - mRNA     | 0.965119399 | 4.443380835 |
| RASGRF1 - mRNA   | 0.962469575 | 3.04267522  |
| DCLK1 - mRNA     | 0.962464282 | 1.797943437 |
| SHC3 - mRNA      | 0.961235177 | 3.433607734 |
| ACSL4 - mRNA     | 0.959394811 | 3.80475451  |
| ATP6V1C1 - mRNA  | 0.948824655 | 2.490877896 |
| DNAJC5 - mRNA    | 0.943238687 | 3.72288062  |
| ATP1A1 - mRNA    | 0.935891012 | 1.985968873 |
| THY1 - mRNA      | 0.923503371 | 2.192981444 |
| CUX2 - mRNA      | 0.913827343 | 2.155251033 |
| MAL2 - mRNA      | 0.902747239 | 1.990336016 |
| CDK5R1 - mRNA    | 0.888240135 | 3.108818381 |
| AKT3 - mRNA      | 0.882159071 | 5.067588548 |
| NDUFB5 - mRNA    | 0.88202676  | 2.462037282 |
| CCNA1 - mRNA     | 0.874553085 | 3.660615382 |
| ERLEC1 - mRNA    | 0.870932918 | 2.056460252 |
| GPM6A - mRNA     | 0.859561301 | 2.347365339 |
| NCAN - mRNA      | 0.859469661 | 2.038926235 |
| TNFRSF11A - mRNA | 0.853762528 | 3.599233881 |
| PRKACB - mRNA    | 0.838274822 | 2.353137015 |
| CD47 - mRNA      | 0.838044401 | 2.324197232 |

|                 |             |             |
|-----------------|-------------|-------------|
| CHRNA2 - mRNA   | 0.82749162  | 1.863484769 |
| TUSC3 - mRNA    | 0.826263872 | 1.713636951 |
| GLS - mRNA      | 0.814156846 | 2.259348658 |
| PPP2CA - mRNA   | 0.812230706 | 3.383232914 |
| GRIN2A - mRNA   | 0.810991331 | 1.783510405 |
| MAP2K4 - mRNA   | 0.809194743 | 2.996969002 |
| RORB - mRNA     | 0.802570777 | 1.992757562 |
| ATP6VOD1 - mRNA | 0.783279941 | 3.003200326 |
| ZNF365 - mRNA   | 0.782645652 | 1.805601788 |
| YWHAZ - mRNA    | 0.767980763 | 1.884538749 |
| LGMN - mRNA     | 0.767724646 | 2.675968969 |
| UBE2N - mRNA    | 0.766382926 | 4.269228862 |
| NLK - mRNA      | 0.765657757 | 2.327488828 |
| CYFIP2 - mRNA   | 0.763266633 | 2.544689517 |
| TANC2 - mRNA    | 0.751802158 | 2.74408857  |
| PRKCZ - mRNA    | 0.74386205  | 1.957067863 |
| ATP6V1E1 - mRNA | 0.71899494  | 1.787761678 |
| ATP5MC3 - mRNA  | 0.716880176 | 2.742671217 |
| ARPC5L - mRNA   | 0.715565935 | 2.296888637 |
| HK1 - mRNA      | 0.714724418 | 3.933186341 |
| FGF13 - mRNA    | 0.707558202 | 1.780608037 |
| NRCAM - mRNA    | 0.699394099 | 3.613846441 |
| DNAJA2 - mRNA   | 0.696784447 | 2.085295738 |
| SEC61A2 - mRNA  | 0.6852858   | 2.711823267 |
| BASP1 - mRNA    | 0.68366809  | 2.132921611 |
| HSP90AB1 - mRNA | 0.683387239 | 2.701011871 |
| DLAT - mRNA     | 0.682127404 | 2.906699187 |

|                  |             |             |
|------------------|-------------|-------------|
| OPA1 - mRNA      | 0.677233346 | 2.118651084 |
| ATP6V1D - mRNA   | 0.67578652  | 2.417188509 |
| CALM1 - mRNA     | 0.67231428  | 1.966211372 |
| DIAPH1 - mRNA    | 0.671718791 | 2.312973248 |
| CACNA2D1 - mRNA  | 0.664952207 | 2.485190098 |
| MAD2L1 - mRNA    | 0.651720161 | 2.482135437 |
| NKIRAS1 - mRNA   | 0.643702183 | 2.262960325 |
| GNAI1 - mRNA     | 0.640217588 | 1.714972328 |
| MAPK8 - mRNA     | 0.634886871 | 2.518950744 |
| GRIA2 - mRNA     | 0.633101085 | 1.795734936 |
| CLTC - mRNA      | 0.631539492 | 2.682689277 |
| PSMA5 - mRNA     | 0.627739528 | 2.96244203  |
| TRIM3 - mRNA     | 0.625796777 | 2.160900959 |
| SYNGR1 - mRNA    | 0.613098286 | 2.033077213 |
| ATP6V1H - mRNA   | 0.61280585  | 1.715251035 |
| NCKAP1 - mRNA    | 0.606602325 | 1.844293695 |
| PGK1 - mRNA      | 0.60119424  | 2.077691906 |
| TXN - mRNA       | 0.596388953 | 2.223449833 |
| ATG5 - mRNA      | 0.59631649  | 2.087479756 |
| B4GALT5 - mRNA   | 0.592375921 | 2.234431387 |
| STAMBPL1 - mRNA  | 0.591910365 | 2.562838417 |
| ZPR1 - mRNA      | 0.589918468 | 3.434021774 |
| ACLY - mRNA      | 0.586144442 | 3.12739573  |
| PSMC6 - mRNA     | 0.575497493 | 2.714056811 |
| MAPK1 - mRNA     | 0.572836084 | 2.687324183 |
| TNFRSF21 - mRNA  | 0.572146782 | 2.144145178 |
| GABARAPL1 - mRNA | 0.564215775 | 1.738782735 |

|                  |             |             |
|------------------|-------------|-------------|
| APP - mRNA       | 0.560003051 | 1.821531602 |
| MEAF6 - mRNA     | 0.55572239  | 2.33573698  |
| REEP5 - mRNA     | 0.534216313 | 2.051347495 |
| RLIM - mRNA      | 0.528364097 | 2.131842654 |
| SHANK2 - mRNA    | 0.525302598 | 1.808518577 |
| ACSL3 - mRNA     | 0.512476292 | 2.765626134 |
| YWHAE - mRNA     | 0.510352923 | 1.997561794 |
| CSNK2A1/3 - mRNA | 0.508070203 | 2.536197367 |
| DYNC1LI1 - mRNA  | 0.507608722 | 1.979187294 |
| GSK3B - mRNA     | 0.502941772 | 2.4575882   |
| ABI2 - mRNA      | 0.502550718 | 2.620434724 |
| AP3M2 - mRNA     | 0.498920213 | 1.754309728 |
| ATP2A2 - mRNA    | 0.498462148 | 2.294913287 |
| FIG4 - mRNA      | 0.496092259 | 2.24362366  |
| BRAF - mRNA      | 0.492302539 | 3.045037412 |
| ANAPC1 - mRNA    | 0.491267133 | 2.618024011 |
| KRAS - mRNA      | 0.48435897  | 1.881810293 |
| DNM3 - mRNA      | 0.465614224 | 1.704831045 |
| CUL1 - mRNA      | 0.44181277  | 2.400804532 |
| ULK1 - mRNA      | 0.433505093 | 1.904689803 |
| SERINC3 - mRNA   | 0.431901038 | 2.096997932 |
| GNB1 - mRNA      | 0.423548346 | 2.892864251 |
| ATRN - mRNA      | 0.412060634 | 1.850877956 |
| PRKCI - mRNA     | 0.411938315 | 2.144298639 |
| RAD23B - mRNA    | 0.404755516 | 2.092129219 |
| KPNA1 - mRNA     | 0.381365508 | 2.241218693 |
| ABCE1 - mRNA     | 0.363557028 | 1.878343697 |
| PDHA1 - mRNA     | 0.35717273  | 1.931822902 |
| ATP9A - mRNA     | 0.345132246 | 1.876206705 |

|                |              |             |
|----------------|--------------|-------------|
| PSMD14 - mRNA  | 0.329644117  | 1.713425726 |
| CTSD - mRNA    | -0.393157053 | 1.920089355 |
| JAK1 - mRNA    | -0.416864604 | 1.974333465 |
| RECK - mRNA    | -0.45556215  | 2.453338079 |
| TICAM1 - mRNA  | -0.496543176 | 2.373288141 |
| HSD17B4 - mRNA | -0.505298988 | 3.206893239 |
| STAT2 - mRNA   | -0.546190807 | 2.726190105 |
| GAS6 - mRNA    | -0.564993165 | 2.231567017 |
| AKT1 - mRNA    | -0.586231835 | 1.770457928 |
| PKD2 - mRNA    | -0.587444597 | 2.949793233 |
| DLX2 - mRNA    | -0.58971835  | 1.964722442 |
| BHLHE41 - mRNA | -0.594814879 | 1.796635386 |
| SLC46A1 - mRNA | -0.615250765 | 2.307265974 |
| NINJ2 - mRNA   | -0.623288297 | 1.79239465  |
| OLIG2 - mRNA   | -0.660888561 | 2.258969711 |
| TJP1 - mRNA    | -0.670529882 | 2.062996634 |
| SCD5 - mRNA    | -0.687825965 | 1.758334233 |
| DLX1 - mRNA    | -0.697677515 | 1.820857037 |
| SCP2 - mRNA    | -0.702742456 | 3.028781995 |
| ITGAM - mRNA   | -0.712150444 | 1.843638005 |
| CNP - mRNA     | -0.728876524 | 2.624542907 |
| ADGRA2 - mRNA  | -0.732452577 | 2.336367627 |
| PTGIS - mRNA   | -0.734615836 | 1.884051201 |
| ENTPD1 - mRNA  | -0.746925918 | 2.588440584 |
| ITM2A - mRNA   | -0.771108243 | 1.912806701 |
| EGF - mRNA     | -0.775219311 | 2.172442703 |
| ERMN - mRNA    | -0.784402119 | 1.833821456 |
| ITGAX - mRNA   | -0.806770926 | 1.963235045 |
| AHCYL1 - mRNA  | -0.814555336 | 1.719177829 |
| CPNE2 - mRNA   | -0.816474996 | 2.477271213 |



|                |              |             |
|----------------|--------------|-------------|
| CYSLTR1 - mRNA | -0.818440428 | 2.024348128 |
| HSD11B1 - mRNA | -0.829698574 | 2.98963908  |
| SALL1 - mRNA   | -0.836885748 | 1.702787451 |
| LAMP2 - mRNA   | -0.838638926 | 3.034281228 |
| TIMP2 - mRNA   | -0.852727158 | 3.174280616 |
| CSPG4 - mRNA   | -0.855282168 | 1.699097591 |
| ITGA7 - mRNA   | -0.858253307 | 2.203417138 |
| GRN - mRNA     | -0.860959026 | 3.931396962 |
| P2RY11 - mRNA  | -0.861122587 | 2.363630703 |
| IL21R - mRNA   | -0.863811934 | 1.805678387 |
| SOX2 - mRNA    | -0.884088718 | 2.912064408 |
| CCR5 - mRNA    | -0.887486059 | 2.303424229 |
| GJB1 - mRNA    | -0.89409743  | 3.840177354 |
| CEACAM3 - mRNA | -0.917447635 | 1.718815784 |
| MS4A1 - mRNA   | -0.922784681 | 1.894304516 |
| KLRK1 - mRNA   | -0.923118215 | 2.03734365  |
| HLA-A - mRNA   | -0.924505983 | 1.950258982 |
| MAFB - mRNA    | -0.928106095 | 3.596527029 |
| LSR - mRNA     | -0.937991062 | 2.099391279 |
| MERTK - mRNA   | -0.942230697 | 2.973753083 |
| CNTF - mRNA    | -0.945181184 | 3.440543396 |
| PLP1 - mRNA    | -0.950394766 | 2.616822875 |
| PTGER4 - mRNA  | -0.953627861 | 2.238905125 |
| TMEM119 - mRNA | -0.955240123 | 2.408504381 |
| NOSTRIN - mRNA | -0.95620864  | 1.812194123 |
| CD9 - mRNA     | -0.965362371 | 1.928068069 |
| SELENOS - mRNA | -0.966025536 | 2.381926915 |
| TFEC - mRNA    | -0.979529846 | 1.783661122 |
| ALDH1L1 - mRNA | -0.988282388 | 2.232382152 |

|                |              |             |
|----------------|--------------|-------------|
| OLIG1 - mRNA   | -0.988747174 | 2.127124767 |
| IL10RA - mRNA  | -0.989385237 | 2.762111199 |
| SOX10 - mRNA   | -0.994836926 | 2.677931345 |
| NLRP1 - mRNA   | -0.995131928 | 2.01611036  |
| CTSS - mRNA    | -0.996525135 | 1.896037781 |
| FA2H - mRNA    | -0.999281332 | 2.836512415 |
| KCND1 - mRNA   | -1.003038114 | 2.687292711 |
| SLC2A5 - mRNA  | -1.004509425 | 1.713068445 |
| SLCO2B1 - mRNA | -1.008026648 | 2.834218529 |
| PMP22 - mRNA   | -1.014416151 | 4.048081157 |
| ERBB3 - mRNA   | -1.015788801 | 3.895007325 |
| PRF1 - mRNA    | -1.025002674 | 1.759210446 |
| CSF1 - mRNA    | -1.032192991 | 2.13951733  |
| TLR7 - mRNA    | -1.035948571 | 1.770316797 |
| MYRF - mRNA    | -1.036655394 | 1.869629617 |
| CD33 - mRNA    | -1.0445459   | 2.984907092 |
| C1S - mRNA     | -1.047837809 | 2.101137736 |
| PLXDC2 - mRNA  | -1.053157797 | 4.198921334 |
| MAG - mRNA     | -1.062027221 | 1.908761951 |
| UGT8 - mRNA    | -1.065450174 | 3.115791754 |
| ALDH1A1 - mRNA | -1.070393671 | 2.369309764 |
| PTPRC - mRNA   | -1.073119834 | 2.329953915 |
| TGM1 - mRNA    | -1.075140124 | 2.938760734 |
| KLRB1 - mRNA   | -1.077875323 | 1.96157755  |
| SPI1 - mRNA    | -1.081145312 | 2.640229366 |
| KIR2DL3 - mRNA | -1.090713511 | 1.774319322 |
| P2RY14 - mRNA  | -1.092290684 | 2.475477055 |
| HDC - mRNA     | -1.099492654 | 2.216447345 |
| TSPO - mRNA    | -1.113641609 | 2.881174716 |
| TIE1 - mRNA    | -1.118034156 | 2.535422157 |

|                  |              |             |
|------------------|--------------|-------------|
| CD3D - mRNA      | -1.13214563  | 1.97727806  |
| TGFB1 - mRNA     | -1.133335462 | 2.91861679  |
| CLDN5 - mRNA     | -1.154996705 | 2.295071942 |
| ADCYAP1R1 - mRNA | -1.166703069 | 4.400938125 |
| CLEC7A - mRNA    | -1.178811097 | 2.071823739 |
| TBX21 - mRNA     | -1.194747791 | 2.375802367 |
| EGFR - mRNA      | -1.195300507 | 3.433184742 |
| FAM30A - mRNA    | -1.196299873 | 2.325579871 |
| KCTD12 - mRNA    | -1.198689902 | 3.187341701 |
| LILRB4 - mRNA    | -1.199190275 | 3.242314051 |
| C3AR1 - mRNA     | -1.202783824 | 1.79753248  |
| AQP4 - mRNA      | -1.205206913 | 3.344658196 |
| ADORA3 - mRNA    | -1.213055577 | 1.883250749 |
| MS4A4A - mRNA    | -1.227267878 | 1.888386446 |
| CD109 - mRNA     | -1.235071695 | 2.247720553 |
| VIM - mRNA       | -1.265467861 | 2.051753652 |
| SELPLG - mRNA    | -1.266346765 | 2.496666015 |
| TLR3 - mRNA      | -1.274374674 | 2.934684593 |
| P2RY1 - mRNA     | -1.277152616 | 3.150082053 |
| LAIR1 - mRNA     | -1.281506596 | 2.304075187 |
| CSF1R - mRNA     | -1.289868506 | 2.513658092 |
| RHOB - mRNA      | -1.294972863 | 3.414023611 |
| SOX9 - mRNA      | -1.297539906 | 3.769367195 |
| RFX4 - mRNA      | -1.307713927 | 2.858941921 |
| AGMO - mRNA      | -1.324806147 | 2.959027559 |
| FCGRT - mRNA     | -1.325799855 | 3.695450178 |
| LRRC25 - mRNA    | -1.355495124 | 3.355357204 |
| PLEKHB1 - mRNA   | -1.356334235 | 3.087056281 |
| TLR4 - mRNA      | -1.363957215 | 2.873748979 |

|                 |              |             |
|-----------------|--------------|-------------|
| ABCA1 - mRNA    | -1.390588748 | 2.437425864 |
| TLR2 - mRNA     | -1.414107956 | 3.034313079 |
| SERPING1 - mRNA | -1.432977066 | 3.05399254  |
| GDPD2 - mRNA    | -1.463402045 | 3.608418821 |
| IGFBP5 - mRNA   | -1.466368999 | 3.044012993 |
| S100A10 - mRNA  | -1.469458217 | 2.343770131 |
| SLC11A1 - mRNA  | -1.487931058 | 2.137304111 |
| SIGLEC5 - mRNA  | -1.503273686 | 2.193316068 |
| CSF3R - mRNA    | -1.505708199 | 3.943722943 |
| CFI - mRNA      | -1.509878234 | 2.303204162 |
| GSN - mRNA      | -1.595054098 | 3.870541338 |
| NWD1 - mRNA     | -1.603964624 | 2.599739074 |
| SPARC - mRNA    | -1.605325113 | 3.081767932 |
| IL18 - mRNA     | -1.655704436 | 2.78974419  |
| PLXNB3 - mRNA   | -1.766036402 | 4.291146844 |
| CD163 - mRNA    | -1.949612756 | 2.588219644 |
| ENTPD2 - mRNA   | -2.279332349 | 4.101361828 |
| CD44 - mRNA     | -2.364184755 | 1.876769291 |
| C4A/B - mRNA    | -2.716240375 | 4.539406814 |
| GFAP - mRNA     | -3.08847536  | 4.638839401 |

---

**Supplementary Table S3.** DisGeNET analysis of genes *GFAP* and *RTN4* involved in COVID-19 and FTD

| Gene        | DPI   | DSI   | pLi      |
|-------------|-------|-------|----------|
| <i>GFAP</i> | 0.885 | 0.421 | 1.46E-06 |
| <i>RTN4</i> | 0.692 | 0.621 | 0.45318  |

**Supplementary Table S4.** List of approved and immunotherapeutic drugs interactions for the FTD-breast cancer comorbid genes using the drug gene interaction database (DGIdb) [https://www.dgldb.org/search\\_interactions](https://www.dgldb.org/search_interactions)

| <i>AKT3</i>                      | <i>VDAC1</i>                     | <i>ADCYAP1R1</i>                 | <i>GFAP</i>                      |
|----------------------------------|----------------------------------|----------------------------------|----------------------------------|
| Drug Name<br>(Interaction Score) | Drug Name<br>(Interaction Score) | Drug Name<br>(Interaction Score) | Drug Name<br>(Interaction Score) |
| XL-418 (2.25)                    | OLESOXIME (15.46)                | NALOXONE (5.62)                  | SORBITOL (1.65)                  |
| IPATASERTIB (1.61)               |                                  | INSULIN (1.21)                   | PERMETHRIN (1.24)                |
| AFURESERTIB (1.41)               |                                  |                                  | FADROZOLE (0.99)                 |
| TRICIRIBINE (1.12)               |                                  |                                  | DEMECOLCINE (0.82)               |
| MK-2201 (0.94)                   |                                  |                                  | OPRELVEKIN (0.82)                |
| MIRANSERTIB (0.94)               |                                  |                                  | DRONABINOL (0.62)                |
| AZD-5363 (0.94)                  |                                  |                                  | AMPHETAMINE (0.57)               |
| SR-13668 (0.94)                  |                                  |                                  | PIOGLITAZONE (0.33)              |
| ARCHEXIN (0.94)                  |                                  |                                  | CAPSAICIN (0.33)                 |
| MSC-2363318A (0.94)              |                                  |                                  | NIMODIPINE (0.33)                |
| TRICIRIBINE PHOSPHATE (0.94)     |                                  |                                  | PROPRANOLOL (0.31)               |
| UPROSERTIB (0.94)                |                                  |                                  | PRASTERONE (0.27)                |
| MK-2206 (0.83)                   |                                  |                                  | METHIMAZOLE (0.27)               |
| CAPIVASERTIB (0.62)              |                                  |                                  | NIFEDIPINE (0.21)                |
| LY-2780301 (0.56)                |                                  |                                  | MELATONIN (0.19)                 |
| PERIFOSINE (0.56)                |                                  |                                  | CAFFEINE (0.18)                  |
| GSK-690693 (0.33)                |                                  |                                  | STAUROSPORINE (0.18)             |
| VEMURAFENIB (0.19)               |                                  |                                  | ISOPROTERENOL (0.18)             |
| OMIPALISIB (0.15)                |                                  |                                  | COLCHICINE (0.16)                |
| FASUDIL (0.09)                   |                                  |                                  | PENTOXIFYLLINE (0.15)            |
| EVEROLIMUS (0.07)                |                                  |                                  | DISULFIRAM (0.13)                |
| GSK-269962A (0.06)               |                                  |                                  | LITHIUM (0.11)                   |
|                                  |                                  |                                  | GENISTEIN (0.1)                  |
|                                  |                                  |                                  | PROGESTERONE (0.07)              |
|                                  |                                  |                                  | ASPIRIN (0.07)                   |

**Supplementary Table S5:** List of RNA binding proteins interacting with the FTD-breast cancer comorbid genes *AKT3*, *VDAC1*, *ADCYAP1R1*, *GFAP*, *C4A*

| RBP     | gene ID                         | Gene Name   | Tissue | Disease Num | Diseases                                                                                                                        | cosmicNum | Sample Num | mutType Num | clipExp Num | Clip Num |
|---------|---------------------------------|-------------|--------|-------------|---------------------------------------------------------------------------------------------------------------------------------|-----------|------------|-------------|-------------|----------|
| EIF4A3  | ENS<br>G00<br>0001<br>1702<br>0 | <i>AKT3</i> | breast | 2           | ductal carcinoma, carcinoma                                                                                                     | 3         | 3          | 1           | 1           | 2        |
| FBL     | ENS<br>G00<br>0001<br>1702<br>0 | <i>AKT3</i> | breast | 3           | ductal carcinoma, ductalobular carcinoma, carcinoma                                                                             | 5         | 5          | 1           | 2           | 4        |
| FMR1    | ENS<br>G00<br>0001<br>1702<br>0 | <i>AKT3</i> | breast | 6           | ductal carcinoma, ductalobular carcinoma-PR-positive carcinoma, lobular carcinoma, basal (triple-negative) carcinoma, carcinoma | 12        | 12         | 3           | 4           | 12       |
| IGF2BP1 | ENS<br>G00<br>0001<br>1702<br>0 | <i>AKT3</i> | breast | 5           | duct lobular carcinoma-PR-positive carcinoma, lobular carcinoma, basal (triple-negative) carcinoma, carcinoma                   | 7         | 7          | 3           | 1           | 6        |
| IGF2BP2 | ENS<br>G00<br>0001<br>1702<br>0 | <i>AKT3</i> | breast | 6           | ductal carcinoma, ductalobular carcinoma, ER-PR-positive carcinoma, lobular carcinoma, basal                                    | 12        | 12         | 3           | 5           | 18       |

|         |                                 |             |        |   |                                                                                                                                  |   |   |   |   |    |
|---------|---------------------------------|-------------|--------|---|----------------------------------------------------------------------------------------------------------------------------------|---|---|---|---|----|
|         |                                 |             |        |   | (triple-negative)<br>carcinoma, carcinoma                                                                                        |   |   |   |   |    |
| IGF2BP3 | ENS<br>G00<br>0001<br>1702<br>0 | <i>AKT3</i> | breast | 5 | ductal<br>carcinoma, ductalobular<br>carcinoma, ER-PR-<br>positive carcinoma, basal<br>(triple-negative)<br>carcinoma, carcinoma | 7 | 7 | 3 | 1 | 4  |
| MOV10   | ENS<br>G00<br>0001<br>1702<br>0 | <i>AKT3</i> | breast | 5 | ductal<br>carcinoma, ductalobular<br>carcinoma, ER-PR-<br>positive carcinoma, basal<br>(triple-negative)<br>carcinoma, carcinoma | 7 | 7 | 2 | 4 | 10 |
| NOP56   | ENS<br>G00<br>0001<br>1702<br>0 | <i>AKT3</i> | breast | 1 | carcinoma                                                                                                                        | 1 | 1 | 1 | 1 | 1  |
| NOP58   | ENS<br>G00<br>0001<br>1702<br>0 | <i>AKT3</i> | breast | 3 | ductalobular carcinoma,<br>basal (triple-negative)<br>carcinoma, carcinoma                                                       | 4 | 4 | 3 | 2 | 6  |
| RBM47   | ENS<br>G00<br>0001<br>1702<br>0 | <i>AKT3</i> | breast | 5 | ductal<br>carcinoma, ductalobular<br>carcinoma, lobular<br>carcinoma, basal (triple-<br>negative) carcinoma,<br>carcinoma        | 6 | 6 | 2 | 1 | 4  |
| SRSF1   | ENS<br>G00<br>0001              | <i>AKT3</i> | breast | 2 | ductal carcinoma,<br>carcinoma                                                                                                   | 2 | 2 | 1 | 1 | 1  |



|         |                                 |                       |        |   |                                     |   |   |   |   |   |
|---------|---------------------------------|-----------------------|--------|---|-------------------------------------|---|---|---|---|---|
|         | 1702<br>0                       |                       |        |   |                                     |   |   |   |   |   |
| EIF4A3  | ENS<br>G00<br>0002<br>1358<br>5 | <i>VDAC1</i>          | breast | 2 | metaplastic carcinoma,<br>carcinoma | 3 | 3 | 2 | 2 | 4 |
| IGF2BP2 | ENS<br>G00<br>0002<br>1358<br>5 | <i>VDAC1</i>          | breast | 2 | metaplastic carcinoma,<br>carcinoma | 2 | 2 | 1 | 2 | 2 |
| DGCR8   | ENS<br>G00<br>0000<br>7854<br>9 | <i>ADCYA<br/>PIR1</i> | breast | 1 | carcinoma                           | 1 | 1 | 1 | 1 | 1 |
| DGCR8   | ENS<br>G00<br>0001<br>3109<br>5 | <i>GFAP</i>           | breast | 1 | carcinoma                           | 1 | 1 | 1 | 1 | 1 |
| FUS     | ENS<br>G00<br>0001<br>3109<br>5 | <i>GFAP</i>           | breast | 1 | carcinoma                           | 1 | 1 | 1 | 1 | 1 |
| AUH     | ENS<br>G00<br>0002<br>4473<br>1 | <i>C4A</i>            | breast | 2 | ductal carcinoma,<br>carcinoma      | 2 | 2 | 2 | 2 | 2 |

|             |                                 |     |        |   |                                |   |   |   |   |   |
|-------------|---------------------------------|-----|--------|---|--------------------------------|---|---|---|---|---|
| BCCIP       | ENS<br>G00<br>0002<br>4473<br>1 | C4A | breast | 2 | ductal carcinoma,<br>carcinoma | 2 | 2 | 2 | 2 | 2 |
| BUD13       | ENS<br>G00<br>0002<br>4473<br>1 | C4A | breast | 2 | ductal carcinoma,<br>carcinoma | 3 | 3 | 2 | 2 | 3 |
| CSTF2T      | ENS<br>G00<br>0002<br>4473<br>1 | C4A | breast | 1 | carcinoma                      | 1 | 1 | 1 | 1 | 1 |
| EIF4A3      | ENS<br>G00<br>0002<br>4473<br>1 | C4A | breast | 2 | ductal carcinoma,<br>carcinoma | 2 | 2 | 1 | 2 | 2 |
| FAM120A     | ENS<br>G00<br>0002<br>4473<br>1 | C4A | breast | 2 | ductal carcinoma,<br>carcinoma | 2 | 2 | 2 | 2 | 2 |
| GTF2F1      | ENS<br>G00<br>0002<br>4473<br>1 | C4A | breast | 2 | ductal carcinoma,<br>carcinoma | 2 | 2 | 2 | 2 | 2 |
| HNRNPA<br>1 | ENS<br>G00<br>0002              | C4A | breast | 2 | ductal carcinoma,<br>carcinoma | 2 | 2 | 2 | 1 | 1 |

|              |                                 |            |        |   |                                |   |   |   |   |   |
|--------------|---------------------------------|------------|--------|---|--------------------------------|---|---|---|---|---|
|              | 4473<br>1                       |            |        |   |                                |   |   |   |   |   |
| HNRNPC       | ENS<br>G00<br>0002<br>4473<br>1 | <i>C4A</i> | breast | 1 | carcinoma                      | 1 | 1 | 1 | 1 | 1 |
| HNRNPK       | ENS<br>G00<br>0002<br>4473<br>1 | <i>C4A</i> | breast | 2 | ductal carcinoma,<br>carcinoma | 2 | 2 | 2 | 1 | 1 |
| HNRNPU<br>L1 | ENS<br>G00<br>0002<br>4473<br>1 | <i>C4A</i> | breast | 2 | ductal carcinoma,<br>carcinoma | 2 | 2 | 2 | 1 | 1 |
| IGF2BP1      | ENS<br>G00<br>0002<br>4473<br>1 | <i>C4A</i> | breast | 2 | ductal carcinoma,<br>carcinoma | 2 | 2 | 2 | 2 | 2 |
| IGF2BP3      | ENS<br>G00<br>0002<br>4473<br>1 | <i>C4A</i> | breast | 2 | ductal carcinoma,<br>carcinoma | 2 | 2 | 2 | 2 | 2 |
| LARP7        | ENS<br>G00<br>0002<br>4473<br>1 | <i>C4A</i> | breast | 2 | ductal carcinoma,<br>carcinoma | 2 | 2 | 2 | 1 | 1 |

|        |                                 |     |        |   |                                |   |   |   |   |   |
|--------|---------------------------------|-----|--------|---|--------------------------------|---|---|---|---|---|
| LIN28B | ENS<br>G00<br>0002<br>4473<br>1 | C4A | breast | 2 | ductal carcinoma,<br>carcinoma | 2 | 2 | 2 | 2 | 2 |
| PRPF8  | ENS<br>G00<br>0002<br>4473<br>1 | C4A | breast | 2 | ductal carcinoma,<br>carcinoma | 2 | 2 | 2 | 1 | 1 |
| RBFOX2 | ENS<br>G00<br>0002<br>4473<br>1 | C4A | breast | 2 | ductal carcinoma,<br>carcinoma | 2 | 2 | 2 | 1 | 1 |
| SF3A3  | ENS<br>G00<br>0002<br>4473<br>1 | C4A | breast | 2 | ductal carcinoma,<br>carcinoma | 2 | 2 | 2 | 2 | 2 |
| SF3B4  | ENS<br>G00<br>0002<br>4473<br>1 | C4A | breast | 2 | ductal carcinoma,<br>carcinoma | 2 | 2 | 2 | 2 | 2 |
| SLTM   | ENS<br>G00<br>0002<br>4473<br>1 | C4A | breast | 2 | ductal carcinoma,<br>carcinoma | 2 | 2 | 2 | 1 | 1 |
| SMNDC1 | ENS<br>G00<br>0002              | C4A | breast | 2 | ductal carcinoma,<br>carcinoma | 2 | 2 | 2 | 2 | 2 |

|       |                                 |            |        |   |                                |   |   |   |   |   |
|-------|---------------------------------|------------|--------|---|--------------------------------|---|---|---|---|---|
|       | 4473<br>1                       |            |        |   |                                |   |   |   |   |   |
| SND1  | ENS<br>G00<br>0002<br>4473<br>1 | <i>C4A</i> | breast | 2 | ductal carcinoma,<br>carcinoma | 2 | 2 | 2 | 2 | 2 |
| SRSF1 | ENS<br>G00<br>0002<br>4473<br>1 | <i>C4A</i> | breast | 2 | ductal carcinoma,<br>carcinoma | 2 | 2 | 2 | 2 | 2 |
| SRSF7 | ENS<br>G00<br>0002<br>4473<br>1 | <i>C4A</i> | breast | 2 | ductal carcinoma,<br>carcinoma | 2 | 2 | 2 | 2 | 2 |
| SRSF9 | ENS<br>G00<br>0002<br>4473<br>1 | <i>C4A</i> | breast | 2 | ductal carcinoma,<br>carcinoma | 2 | 2 | 2 | 2 | 2 |
| TRA2A | ENS<br>G00<br>0002<br>4473<br>1 | <i>C4A</i> | breast | 2 | ductal carcinoma,<br>carcinoma | 2 | 2 | 2 | 1 | 1 |
| U2AF1 | ENS<br>G00<br>0002<br>4473<br>1 | <i>C4A</i> | breast | 2 | ductal carcinoma,<br>carcinoma | 2 | 2 | 2 | 2 | 2 |

**Supplementary Table S6.** List of RNA binding proteins interacting with the FTD-breast cancer comorbid genes

| GeneID          | GeneName  | GeneType       | RBP    | ClusterNum | ClipSiteNum |
|-----------------|-----------|----------------|--------|------------|-------------|
| ENSG00000117020 | AKT3      | protein_coding | TARDBP | 84         | 783         |
| ENSG00000213585 | VDAC1     | protein_coding | TARDBP | 12         | 284         |
| ENSG00000078549 | ADCYAP1R1 | protein_coding | TARDBP | 9          | 65          |
| ENSG00000131095 | GFAP      | protein_coding | MBNL2  | 6          | 41          |

**Supplementary Table S7.** RBP-mRNA Interaction for FTD-breast cancer comorbid genes

| GeneID          | GeneName  | GeneType       | PairGeneID     | PairGeneName | PairGeneType | Interaction | AlignScore | MaxConMatch |
|-----------------|-----------|----------------|----------------|--------------|--------------|-------------|------------|-------------|
| ENSG00000117020 | AKT3      | protein_coding | NR_146151_blat | RNA45SN3     | rRNA         | 25          | 26         | 10          |
| ENSG00000213585 | VDAC1     | protein_coding | SSU-rRNA       | SSU-Rrna     | rRNA         | 119         | 38         | 12          |
| ENSG00000078549 | ADCYAP1R1 | protein_coding | NR_146151_blat | RNA45SN3     | rRNA         | 5           | 17.5       | 9           |
| ENSG00000244731 | C4A       | protein_coding | NR_146151_blat | RNA45SN3     | rRNA         | 6           | 19         | 7           |
| ENSG00000131095 | GFAP      | protein_coding | NR_146151_blat | RNA45SN3     | rRNA         | 5           | 17         | 8           |

**Supplementary Table S8:** Pathogenicity Score of for FTD-breast cancer comorbid genes measured with various pathogenicity score tools

| Genes      | CADD Phred Score | CADD Score | DANN Phred Score | DANN Score | regBase PAT Phred Score | regBase PAT Score | Eigen Phred Score | Eigen Score | FATHM M-MKL Phred Score | FATHMM-MKL Score | Eigen _PC Phred Score | Eigen _PC Score | ReMM Phred Score | ReMM Score | Fit Cons Phred Score | Fit Cons Score | Geno Canyon Phred Score | Geno Canyon Score | LINSI GHT Phred Score | LINSI HT Score | CDTS Phred Score | CDTS Score |
|------------|------------------|------------|------------------|------------|-------------------------|-------------------|-------------------|-------------|-------------------------|------------------|-----------------------|-----------------|------------------|------------|----------------------|----------------|-------------------------|-------------------|-----------------------|----------------|------------------|------------|
| AKT3       | 3.356            | 0.0753     | 6.2867           | 0.764      | 1.1319                  | 0.0136            | 4.6836            | 0.0339      | 8.4019                  | 0.2445           | 5.147                 | 0.1476          | 0.7211           | 0.013      | 5.6188               | 0.0744         | 2.8026                  | 0.0045            | 2.3568                | 0.0449         | 5.0283           | -1.865     |
| VDAC1      | 27.3171          | 5.8886     | 31.0655          | 0.9984     | 25.8373                 | 0.9653            | N/A               | 0           | 33.4932                 | 0.9954           | 0                     | N/A             | 0.989            | 22.8892    | 27.3382              | 0.7015         | 99.3328                 | 1                 | 0                     | N/A            | 13.5348          | -6.9825    |
| GFAP       | 13.6996          | 1.5755     | 7.1954           | 0.7867     | 4.9235                  | 0.0658            | 14.7234           | 0.874       | 7.0101                  | 0.203            | 15.8363               | 1.2607          | 13.6916          | 0.845      | 13.2325              | 0.1218         | 12.4471                 | 1                 | 13.7814               | 0.1907         | 6.5415           | -3.0822    |
| C4A        | 26.4255          | 5.6079     | 24.7412          | 0.9946     | 22.5452                 | 0.9382            | 0                 | NA          | 21.115                  | 0.9794           | 0                     | N/A             | 18.705           | 0.964      | 20.8745              | 0.5776         | 4.7749                  | 0.7376            | 0                     | N/A            | 0                | N/A        |
| ADCYA P1R1 | 11.6226          | 1.1787     | 2.8942           | 0.6248     | 6.245                   | 0.0969            | 13.0173           | 0.6259      | 7.8497                  | 0.226            | 7.467                 | 0.0809          | 11.9722          | 0.795      | 1.8046               | 0.0537         | 5.9097                  | 0.9836            | 14.1871               | 0.2167         | 2.2688           | 1.6776     |

**Key/Legend:**

Phred Score = confidence integral of pathogenicity

Score = Raw Score

Likley Pathogenic

**Supplementary Table S9.** List of 3'aQTL variants from Brain Frontal Cortex tissue for *AKT3* and *GFAP* genes.

| <i>AKT3</i> |                        |                |
|-------------|------------------------|----------------|
| rs ID       | Variant ID             | 3'aQTL P-value |
| rs2502342   | chr1_242907165_C_T_b38 | 0.00003769     |
| rs2998662   | chr1_242903675_G_C_b38 | 0.00001787     |
| rs2998661   | chr1_242903316_G_A_b38 | 0.00001246     |
| rs12077950  | chr1_242902067_T_C_b38 | 0.00003583     |
| rs9725721   | chr1_242901771_G_A_b38 | 0.00003583     |
| rs6429391   | chr1_242901126_T_G_b38 | 0.00003583     |
| rs6429389   | chr1_242900607_C_T_b38 | 0.00003583     |
| rs12075066  | chr1_242900095_T_C_b38 | 0.00003583     |
| rs12078540  | chr1_242899843_G_A_b38 | 0.00003583     |
| rs12073551  | chr1_242898757_T_A_b38 | 0.00003583     |
| rs12087532  | chr1_242898633_C_A_b38 | 0.00003583     |
| <i>GFAP</i> |                        |                |
| rs12941832  | chr17_44910114_G_T_b38 | 0.00007407     |
| rs34902223  | chr17_44870901_C_T_b38 | 0.00007407     |
| rs9895349   | chr17_44866621_C_T_b38 | 0.00007407     |
| rs4793148   | chr17_44762183_C_A_b38 | 0.0000448      |
| rs3764840   | chr17_44760112_C_T_b38 | 0.0000448      |
| rs3760382   | chr17_44758548_T_C_b38 | 0.0000448      |
| rs4426386   | chr17_44758127_A_G_b38 | 0.0000448      |
| rs2337848   | chr17_44754386_G_A_b38 | 0.0000448      |
| rs9893320   | chr17_44747280_T_C_b38 | 0.0000448      |
| rs9911454   | chr17_44743640_C_T_b38 | 0.0000448      |
